# Supplementary material
Source: Springer Nature journal article supplement (https://www.springermedizin.de/resource/supplementary/13023_2009_324_MOESM7_ESM.pdf/9642112)
Supplement: MOESM7 [file 9642112]

### First step

- Screening for STEC → negative → STEC-HUS unlikely
- ADAMTS 13 activity → normal → TTP eliminated
- C3, C4, CFB → low C3 + normal C4 + low or normal CFB  
= complement alternative pathway activation
- MCP expression on leucocytes → decreased → MCP sequencing → MCP-HUS
- Anti-CFH antibodies → positive → anti-CFH antibodies-HUS

### Second step

Decreased C3  
No anti-CFH antibodies

or

Normal C3, CFH, CFI, MCP,  
No anti-CFH antibodies

Decreased CFH

Decreased CFI

Normal CFH and CFI

CFH sequencing

CFI sequencing

C3, CFH and CFI  
sequencing,

CFH, CFI, MCP,  
C3, CFB sequencing,  
CFH MLPA

### Third step

Complete sequencing of all risk factors (including *THBD*) even if a mutation or anti-CFH antibodies have been found
